# Supplementary material for: Hfq Is a Critical Modulator of Pathogenicity of Dickeya oryzae in Rice Seeds and Potato Tubers
Source: MDPI journal article supplement (doi:10.3390/microorganisms10051031), 2022-05-16
Supplement: s1 [file s1]

**Supplementary Table S1. Strains and plasmids used in this study**

| Strains or plasmids            | Relevant phenotypes and characteristics <sup>a</sup>                                                                | Source or reference |
|--------------------------------|---------------------------------------------------------------------------------------------------------------------|---------------------|
| <b><i>Dickeya oryzae</i></b>   |                                                                                                                     |                     |
| EC1                            | Wild-type rice rot pathogen of <i>Dickeya oryzae</i> , Pmb <sup>r</sup>                                             | [1]                 |
| $\Delta hfq_{EC1}$             | $hfq_{EC1}$ deletion mutant derived from EC1                                                                        | This study          |
| $\Delta hfq_{EC1} (hfq_{EC1})$ | The complemented strain of $\Delta hfq_{EC1}$ , Amp <sup>r</sup>                                                    | This study          |
| EC1 <i>zmsD::gfp</i>           | EC1 with a <i>gfp</i> transcriptional fusion in the coding sequence of <i>zmsD</i>                                  | This study          |
| $\Delta hfq_{EC1} zmsD::gfp$   | $\Delta hfq_{EC1}$ with a <i>gfp</i> transcriptional fusion in the coding sequence of <i>zmsD</i>                   | This study          |
| <b><i>Escherichia coli</i></b> |                                                                                                                     |                     |
| CC118                          | Host for plasmids constructed of pKNG101                                                                            | Lab collection      |
| DH5 $\alpha$                   | Host for plasmids constructed of pBBRI-MCS4                                                                         | Lab collection      |
| HB101(pRK2013)                 | <i>Thr leu thi recA hsdR hsdM pro</i> , Km <sup>r</sup>                                                             | Lab collection      |
| <b>Plasmids</b>                |                                                                                                                     |                     |
| pKNG101                        | Knockout vector, Str <sup>r</sup>                                                                                   | Lab collection      |
| pKNG101- $hfq_{EC1}$           | pKNG101 containing in-frame deleted fragment of $hfq_{EC1}$ , Str <sup>r</sup>                                      | This study          |
| pKNG101- <i>zmsD-gfp</i>       | pKNG101 containing in-frame deleted fragment of <i>zmsD</i> and ORF of <i>gfp</i> , Str <sup>r</sup>                | This study          |
| pBBRI-MCS4                     | Multicopy expression vector, Amp <sup>r</sup>                                                                       | Lab collection      |
| pBBRI- $hfq_{EC1}$             | pBBRI-MCS4 containing the coding sequence of $hfq_{EC1}$ at the downstream of <i>lac</i> promoter, Amp <sup>r</sup> | This study          |

<sup>a</sup>Pmb<sup>r</sup>, Amp<sup>r</sup>, Km<sup>r</sup>, or Str<sup>r</sup>: Resistance to polymyxin B, ampicillin, kanamycin, or streptomycin, respectively.

## Reference

- Hussain, M.B.B.M.; Zhang, H.B.; Xu, J.L.; Liu, Q.; Jiang, Z.; Zhang, L.H. The Acyl-Homoserine Lactone-Type Quorum-Sensing System Modulates Cell Motility and Virulence of *Erwinia chrysanthemi* pv. *zeae*. *J. Bacteriol.* **2008**, *190*, 1045–1053, doi:10.1128/JB.01472-07.

**Supplementary Table S2. Primers used in this study**

| Primers | Description                                                         | Sequences                                        |
|---------|---------------------------------------------------------------------|--------------------------------------------------|
| A-1     | Forward primer for upstream of <i>hfq</i> <sub>EC1</sub>            | 5'-CGGGATCCAGAATCAACCCAGTGCGGTC-3'               |
| A-2     | Reverse primer for upstream of <i>hfq</i> <sub>EC1</sub>            | 5'-GCTAAGGGGCAATCTTTGCACGCGTCCTTACCAGTTTACCAC-3' |
| A-3     | Forward primer for downstream of <i>hfq</i> <sub>EC1</sub>          | 5'-GTGGTAAACTGGTAAGGACGCGTGCAAAGATTGCCCTTAGC-3'  |
| A-4     | Reverse primer for downstream of <i>hfq</i> <sub>EC1</sub>          | 5'-GGGGTACCCAAAGACATCCGGTGAAGCG-3'               |
| HB-A-F  | Forward primer for the coding sequence of <i>hfq</i> <sub>EC1</sub> | 5'-CCCAAGCTTCGTTACGCACGGTGATTTCAG-3'             |
| HB-A-R  | Reverse primer for the coding sequence of <i>hfq</i> <sub>EC1</sub> | 5'-CGGGATCCGGCGGGAAAAAGTGCTGATTT-3'              |
| zmsA-F  | Forward primer for qPCR of gene <i>zmsA</i>                         | 5'-ATCGCAGATATCCGCAGTGG-3'                       |
| zmsA-R  | Reverse primer for qPCR of gene <i>zmsA</i>                         | 5'-CGTACCGTAGCCTGTGACTC-3'                       |
| zmsB-F  | Forward primer for qPCR of gene <i>zmsB</i>                         | 5'-CGCCGTTTAAGGCGATTGAG-3'                       |
| zmsB-R  | Reverse primer for qPCR of gene <i>zmsB</i>                         | 5'-GGTGATCCACAGGACGTTT-3'                        |
| zmsC-F  | Forward primer for qPCR of gene <i>zmsC</i>                         | 5'-CGTCGGGTCAAGTATATCGG-3'                       |
| zmsC-R  | Reverse primer for qPCR of gene <i>zmsC</i>                         | 5'-CATCAGGTGTGCAGTGTTC-3'                        |
| zmsD-F  | Forward primer for qPCR of gene <i>zmsD</i>                         | 5'-AGCAGGTGGATCCGCTTATG-3'                       |
| zmsD-R  | Reverse primer for qPCR of gene <i>zmsD</i>                         | 5'-GGGCTACCGCAGTAACACTT-3'                       |
| zmsE-F  | Forward primer for qPCR of gene <i>zmsE</i>                         | 5'-ACAGTGCTAGTGGGCGTTAC-3'                       |
| zmsE-R  | Reverse primer for qPCR of gene <i>zmsE</i>                         | 5'-AACGGAACGTCAACCCAGTT-3'                       |
| zmsF-F  | Forward primer for qPCR of gene <i>zmsF</i>                         | 5'-TGTTAAAGCAGTGTGCGGGT-3'                       |
| zmsF-R  | Reverse primer for qPCR of gene <i>zmsF</i>                         | 5'-ATGGCCTTCCATCTGTTCCG-3'                       |
| zmsG-F  | Forward primer for qPCR of gene <i>zmsG</i>                         | 5'-CAGCAATTGTTGGCGTGGAA-3'                       |
| zmsG-R  | Reverse primer for qPCR of gene <i>zmsG</i>                         | 5'-CTCTATCGCCACCAGCTCAG-3'                       |
| zmsI-F  | Forward primer for qPCR of gene <i>zmsI</i>                         | 5'-GCGCGACGATACCAGTTTTC-3'                       |
| zmsI-R  | Reverse primer for qPCR of gene <i>zmsI</i>                         | 5'-ACACCAGTCAATGCTGCGTA-3'                       |
| zmsJ-F  | Forward primer for qPCR of gene <i>zmsJ</i>                         | 5'-CATCAGACTCGCTGCCGTAT-3'                       |
| zmsJ-R  | Reverse primer for qPCR of gene <i>zmsJ</i>                         | 5'-CCTTTCGGCGTCTCTGTTCT-3'                       |
| zmsK-F  | Forward primer for qPCR of gene <i>zmsK</i>                         | 5'-GTACATCAGATGAGCGGCGA-3'                       |
| zmsK-R  | Reverse primer for qPCR of gene <i>zmsK</i>                         | 5'-ATCCATCGGCACAGGCATAG-3'                       |
| gfp-F   | Forward primer for coding sequence of <i>gfp</i>                    | 5'-atgagccaacaagtcgctgtCCGCTGTCCTTGACTCCACTT-3'  |
| gfp-R   | Reverse primer for coding sequence of <i>gfp</i>                    | 5'-ataacgatcccaccgcgcatcGCGCCCGCAAATTCCTG-3'     |
| D-1     | Forward primer for upstream of <i>zmsD</i>                          | 5'-cccctgcaggtgacggatccTGTATACCCGTGGCAAGGTGA-3'  |
| D-2     | Reverse primer for upstream of <i>zmsD</i>                          | 5'-ACAGCGACTTGTGGCTCATG-3'                       |
| D-3     | Forward primer for downstream of <i>zmsD</i>                        | 5'-GATGCGGGTGGGATCGTT-3'                         |
| D-4     | Reverse primer for downstream of <i>zmsD</i>                        | 5'-gctgttctacttatgtaccAATACTCCCACCGAGGCAGAA-3'   |
